# Supplementary material
Source: publisher figshare collection journal article supplement (https://gsapubs.figshare.com/articles/dataset/_/12536189)
Supplement: Supplementary file 1 [file 1]

## Sheet: Julfa_combined
Table DR5. Raw data of ammonoid distributions at Julfa and Baghuk alongside morphological data of measured specimens.
Specimen no.	Taxon	Section	Meters below boundary clay	Diameter (mm)	Volume body chamber (mm3)	Number of notches
J2010-191	Neoaganides ultimus	Julfa	-0.65
J2011-013	Neoaganides ultimus	Julfa	-1.15
J2012-209	Neoaganides ultimus	Julfa	-0.65
J2012-230	Neoaganides ultimus	Julfa
J2012-219	Pseudogastrioceras relicuum	Julfa
J2011-219	Dzhulfites spinosus	Julfa
J2013-018	Dzhulfites spinosus	Julfa
Zal01	Dzhulfites zalensis	Julfa	-5.3
J2013-043	Dzhulfites zalensis	Julfa
Zal02-15	Dzhulfites zalensis	Julfa	-5.3
J2012-200	Dzhulfites zalensis	Julfa	-4.65
J2012-204	Dzhulfites zalensis	Julfa	-4.65
J2011-006	Dzhulfites hebes	Julfa	-4.4
J2011-007	Dzhulfites hebes	Julfa	-4.4
J2011-001	Paratirolites trapezoidalis	Julfa	-3.2	93.1	92188	12
J2011-003	Paratirolites trapezoidalis	Julfa	-3.45	68.4	32066	12
J2011-104	Paratirolites trapezoidalis	Julfa	-3.45	79.8	51123	13
J2012-196	Paratirolites trapezoidalis	Julfa	-3.05	96.9	101298	13
J2011-004	Paratirolites trapezoidalis	Julfa	-4.1	115.9	173332	13
J2011-103	Paratirolites trapezoidalis	Julfa	-3.65	89.3	79284	13
J2013-031	Paratirolites trapezoidalis	Julfa	-3.2
J2011-005	Paratirolites trapezoidalis	Julfa	-4.1	91.2	84453
J2011-074	Paratirolites trapezoidalis	Julfa	-3.65	87.4	74330
J2012-150	Paratirolites trapezoidalis	Julfa	-3.1	108.3	141421	16
J2012-278	Paratirolites trapezoidalis	Julfa
J2012-289	Paratirolites trapezoidalis	Julfa
J2011-132	Paratirolites coronatus	Julfa	-2.9	106.4	192709	11
J2012-281	Paratirolites coronatus	Julfa	-2.9	125.4	219544	24
J2012-228	Paratirolites coronatus	Julfa	-3.55	89.3	79284	20
J2011-105	Paratirolites coronatus	Julfa
J2011-146	Paratirolites coronatus	Julfa	-3.3	114	239173
J2011-002	Paratirolites birunii	Julfa	-3.2	96.9	85586	14
J2011-076	Paratirolites birunii	Julfa	-3.35	100.7	102320	13
J2011-131	Paratirolites birunii	Julfa	-3.35	95	85910	13
J2012-003	Paratirolites birunii	Julfa
J2012-294	Paratirolites birunii	Julfa	-3.35	114	148452	12
J2011-008	Paratirolites birunii	Julfa	-3.35	83.6	58545	20
J2011-033	Paratirolites birunii	Julfa	-3.2
J2011-034	Paratirolites birunii	Julfa	-3.2
J2011-208	Paratirolites birunii	Julfa	-2.7	102.6	108221
J2011-209	Paratirolites birunii	Julfa	-2.7
J2011-200	Paratirolites kittli	Julfa	-2.65	182.4	701158	18
J2012-285	Paratirolites kittli	Julfa	-3.3	123.5	243269	17
J2011-147	Paratirolites kittli	Julfa	-3.3	136.8	330632	17
J2012-115	Paratirolites kittli	Julfa	-2.95	96.9	101298	12
J2011-203	Paratirolites kittli	Julfa	-3.3	110.2	174922	15
J2012-258	Paratirolites kittli	Julfa	-2.65	115.9	192591	23
J2011-093	Paratirolites kittli	Julfa	-3.1	76	48873	14
J2011-130	Paratirolites kittli	Julfa	-3.35	167.2	584372
J2012-032	Paratirolites kittli	Julfa	-1.85	91.2	97965	20
J2012-043	Paratirolites kittli	Julfa	-3.1	150.1	436746	18
J2011-009	Paratirolites kittli	Julfa	-2.65	106.4	134108
J2011-028	Paratirolites kittli	Julfa	-1.6	81.7	63751	16
J2011-066	Paratirolites kittli	Julfa	-2.65	102.6	139485	15
J2011-068	Paratirolites kittli	Julfa	-2.65	64.6	34816
J2011-069	Paratirolites kittli	Julfa	-2.65	123.5	209715
J2011-071	Paratirolites kittli	Julfa	-2.35	102.6	139485	21
J2011-077	Paratirolites kittli	Julfa	-2.35	150.1	436746	16
J2011-091	Paratirolites kittli	Julfa	-3.1	98.8	124554
J2011-097	Paratirolites kittli	Julfa	-3.35	57	23917
J2011-098	Paratirolites kittli	Julfa	-3.35	55.1	21604
J2011-099	Paratirolites kittli	Julfa	-3.35	79.8	65629	15
J2011-106	Paratirolites kittli	Julfa	-3.35	146.3	404408
J2011-107	Paratirolites kittli	Julfa	-3.35	136.8	330632	19
J2011-135	Paratirolites kittli	Julfa	-2.65	96.9	117505	12
J2011-142	Paratirolites kittli	Julfa	-2.1
J2011-145	Paratirolites kittli	Julfa	-2.65	100.7	79582	13
J2011-153	Paratirolites kittli	Julfa	-2.65	100.7	131879
J2011-202	Paratirolites kittli	Julfa	-1.55	136.8	330632	17
J2011-207	Paratirolites kittli	Julfa	-2.7	108.3	164048	19
J2011-334	Paratirolites kittli	Julfa
J2012-018	Paratirolites kittli	Julfa	-2.45	112.1	156836	17
J2012-019	Paratirolites kittli	Julfa	-2.45	125.4	254671	18
J2012-021	Paratirolites kittli	Julfa	-2.45	96.9	117505
J2012-027	Paratirolites kittli	Julfa	-2.45	114	191338
J2012-085	Paratirolites kittli	Julfa	-2.35	123.5	243269	13
J2012-107	Paratirolites kittli	Julfa	-1.75	138.7	344601	15
J2012-109	Paratirolites kittli	Julfa	-2.3	89.3	91969
J2012-110	Paratirolites kittli	Julfa	-3.35	87.4	86223
J2012-117	Paratirolites kittli	Julfa	-2.65	115.9	201065	12
J2012-125	Paratirolites kittli	Julfa	-3.15	117.8	211117
J2012-138	Paratirolites kittli	Julfa	-3.1	81.7	70429
J2012-139	Paratirolites kittli	Julfa	-2.3	112.1	181930	15
J2012-140	Paratirolites kittli	Julfa	-2.25	83.6	75458
J2012-165	Paratirolites kittli	Julfa	-2.85	108.3	164048	16
J2012-166	Paratirolites kittli	Julfa	-2.85	159.6	525032	15
J2012-170	Paratirolites kittli	Julfa	-2.65	100.7	113689
J2012-172	Paratirolites kittli	Julfa	-2.85	106.4	155565	15
J2012-173	Paratirolites kittli	Julfa	-2.85
J2012-184	Paratirolites kittli	Julfa	-3.1	89.3	91969
J2012-214	Paratirolites kittli	Julfa	-2.45	112.1	181930	13
J2012-235	Paratirolites kittli	Julfa	-2.65	47.5	13841
J2012-256	Paratirolites kittli	Julfa	-2.65
J2012-286	Paratirolites kittli	Julfa	-2.65	87.4	86223	15
J2013-006	Paratirolites kittli	Julfa
J2011-060	Paratirolites vediensis	Julfa	-2.65	159.6	483278	19
J2012-252	Paratirolites vediensis	Julfa	-3.05	136.8	330632	16
J2012-267	Paratirolites vediensis	Julfa	-3.05	85.5	87767	19
J2012-182	Paratirolites vediensis	Julfa	-3.1	100.7	121721	19
J2011-067	Paratirolites vediensis	Julfa	-2.65	129.2	278531	17
J2011-061	Paratirolites vediensis	Julfa	-2.65	172.9	667531
J2011-133	Paratirolites vediensis	Julfa	-2.9	79.8	56577	17
J2012-044	Paratirolites vediensis	Julfa	-3.15	169.1	624479
J2012-254	Paratirolites vediensis	Julfa	-3.05	79.8	56577	13
J2011-095	Paratirolites vediensis	Julfa	-3.3	68.4	39191
J2011-096	Paratirolites vediensis	Julfa	-3.3	114	164947
J2011-134	Paratirolites vediensis	Julfa	-2.65	100.7	131879	17
J2011-139	Paratirolites vediensis	Julfa	-2.1	114	191338
J2011-149	Paratirolites vediensis	Julfa	-3.3	243.2	1857708	20
J2011-158	Paratirolites vediensis	Julfa	-3.3
J2011-160	Paratirolites vediensis	Julfa	-2.65	104.5	147379	20
J2011-161	Paratirolites vediensis	Julfa	-2.65
J2011-172	Paratirolites vediensis	Julfa	-2.65	115.9	201065	19
J2011-183	Paratirolites vediensis	Julfa	-2.65	117.8	211117	21
J2011-184	Paratirolites vediensis	Julfa	-2.65	112.1	181930	17
J2011-206	Paratirolites vediensis	Julfa	-2.7	142.5	373707
J2011-210	Paratirolites vediensis	Julfa	-2.65	142.5	373707	20
J2012-077	Paratirolites vediensis	Julfa	-2.75
J2012-119	Paratirolites vediensis	Julfa	-2.65	100.7	113689
J2012-152	Paratirolites vediensis	Julfa	-2.95	161.5	544007
J2012-229	Paratirolites vediensis	Julfa
J2012-253	Paratirolites vediensis	Julfa	-3.05	133	303838	17
J2012-255	Paratirolites vediensis	Julfa	-3.05	161.5	544007	17
J2012-257	Paratirolites vediensis	Julfa	-2.65	148.2	420370	15
J2012-279	Paratirolites vediensis	Julfa
J2012-280	Paratirolites vediensis	Julfa
J2012-287	Paratirolites vediensis	Julfa
J2011-058	Paratirolites quadratus	Julfa	-1.7
J2011-059	Paratirolites quadratus	Julfa	-1.7	58.9	22750
J2012-193	Paratirolites multiconus	Julfa	-1.1	76	48873	8
J2012-108	Paratirolites multiconus	Julfa	-1.15
J2012-212	Paratirolites serus	Julfa	-0.65	41.8	8131
J2011-049	Paratirolites serus	Julfa	-0.85
J2011-188	Paratirolites serus	Julfa	-0.55
J2012-094	Paratirolites serus	Julfa	-0.75	102.6	88025	12
J2012-095	Paratirolites serus	Julfa	-0.95	79.8	59406	13
J2012-288	Julfotirolites kozuri	Julfa
J2011-062	Julfotirolites kozuri	Julfa	-2.65	77.9	42553	8
J2012-283	Julfotirolites kozuri	Julfa	-2.65	62.7	24699
J2011-021	Alibashites mojsisovicsi	Julfa	-1.35	60.8	25402	8
J2011-022	Alibashites mojsisovicsi	Julfa	-1.55	83.6	58545
J2011-053	Alibashites mojsisovicsi	Julfa	-1.7	68.4	32066	12
J2011-194	Alibashites mojsisovicsi	Julfa	-1.4	77.9	47368
J2011-027	Alibashites mojsisovicsi	Julfa	-1.6	83.6	71555
J2011-181	Alibashites mojsisovicsi	Julfa	-1.85	70.3	34813
J2012-010	Alibashites mojsisovicsi	Julfa
J2012-127	Alibashites mojsisovicsi	Julfa
J2012-287	Alibashites mojsisovicsi	Julfa	-1.85	87.4	66897
J2012-022	Alibashites mojsisovicsi	Julfa	-1.5
J2011-016	Alibashites mojsisovicsi	Julfa	-1.15
J2011-057	Alibashites mojsisovicsi	Julfa	-1.7	66.5	29467
J2011-081	Alibashites mojsisovicsi	Julfa	-1.45	64.6	27013
J2012-099	Alibashites mojsisovicsi	Julfa	-1.85	66.5	29467
J2012-168	Alibashites mojsisovicsi	Julfa	-1.9	49.4	12080
J2012-233	Alibashites mojsisovicsi	Julfa
J2012-243	Alibashites mojsisovicsi	Julfa	-1.65
J2013-001	Alibashites mojsisovicsi	Julfa	-1.85	85.5	92145	15
J2013-010	Alibashites mojsisovicsi	Julfa	-1.85	77.9	57894	13
J2011-204	Alibashites ferdowsii	Julfa	-1.75	68.4	46817
J2012-293	Alibashites ferdowsii	Julfa	-1.75	72.2	62854
J2012-154	Alibashites ferdowsii	Julfa	-1.75	64.6	37518
J2012-001	Alibashites ferdowsii	Julfa	-1.55	83.6	85866	18
J2012-002	Alibashites ferdowsii	Julfa	-1.55	74.1	59794
J2012-078	Alibashites ferdowsii	Julfa	-1.55	96.9	117505	15
J2012-251	Alibashites ferdowsii	Julfa	-1.85	72.2	41903
J2012-299	Alibashites ferdowsii	Julfa	-1.45
J2012-158	Alibashites uncinatus	Julfa	-1.9	81.7	47962	12
J2012-126	Alibashites uncinatus	Julfa	-1.9	60.8	27525	7
J2012-146	Alibashites uncinatus	Julfa	-1.9	43.7	10220	16
J2012-159	Alibashites uncinatus	Julfa	-1.95	68.4	35628
J2011-055	Alibashites uncinatus	Julfa	-1.7
J2011-201	Alibashites uncinatus	Julfa	-1.45
J2011-333	Alibashites uncinatus	Julfa
J2012-153	Alibashites uncinatus	Julfa	-1.65	66.5	32741
J2012-244	Alibashites uncinatus	Julfa	-1.65	77.9	52631	16
J2012-265	Alibashites uncinatus	Julfa	-1.85	72.2	41903
J2012-246	Alibashites stepanovi	Julfa	-1.6	110.2	148996	12
J2012-097	Alibashites stepanovi	Julfa	-1.85	79.8	45733	11
J2012-098	Alibashites stepanovi	Julfa	-1.85	68.4	24239	10
J2012-295	Alibashites stepanovi	Julfa	-1.45
J2012-128	Alibashites stepanovi	Julfa	-1.85	70.3	23208
J2012-017	Alibashites stepanovi	Julfa	-1.55	144.4	388856	19
J2012-062	Alibashites stepanovi	Julfa	-1.7	74.1	27179
J2012-063	Alibashites stepanovi	Julfa	-1.7	76	29324	11
J2012-180	Alibashites stepanovi	Julfa	-1.7	70.3	23208
J2012-236	Alibashites stepanovi	Julfa	-1.7	81.7	32070	9
J2012-241	Alibashites stepanovi	Julfa	-1.7	76	29324	14
J2012-247	Alibashites stepanovi	Julfa	-1.85	62.7	16466	12
J2012-260	Alibashites stepanovi	Julfa	-1.85	70.3	23208	15
J2012-284	Alibashites stepanovi	Julfa	-1.85
J2011-151	Alibashites stepanovi	Julfa	-1.85
J2011-178	Alibashites stepanovi	Julfa	-1.8	76	29324
J2011-179	Alibashites stepanovi	Julfa	-1.8	66.5	19645	13
J2012-036	Alibashites stepanovi	Julfa	-1.85	51.3	9018
J2012-061	Alibashites stepanovi	Julfa	-1.7
J2012-169	Alibashites stepanovi	Julfa	-1.9	102.6	120246
J2012-177	Alibashites stepanovi	Julfa	-1.7	62.7	16466
J2012-179	Alibashites stepanovi	Julfa	-1.7	79.8	33946
J2012-181	Alibashites stepanovi	Julfa	-1.7	53.2	10058
J2012-249	Alibashites stepanovi	Julfa	-1.85
J2012-277	Alibashites stepanovi	Julfa
J2012-282	Alibashites stepanovi	Julfa
J2012-118	Abichites subtrapezoidalis	Julfa	-1.45	66.5	32167	13
J2011-205	Abichites subtrapezoidalis	Julfa	-1.45	87.4	69870	17
J2011-020	Abichites subtrapezoidalis	Julfa	-2.01	79.8	55098	13
J2012-296	Abichites subtrapezoidalis	Julfa	-1.45	49.4	14764
J2011-182	Abichites subtrapezoidalis	Julfa	-1.55	62.7	24957	13
J2012-011	Abichites subtrapezoidalis	Julfa	-2.1	60.8	25023	10
J2012-089	Abichites subtrapezoidalis	Julfa	-1.55	66.5	30777	13
J2012-113	Abichites subtrapezoidalis	Julfa	-1.55	58.9	21385	14
J2012-114	Abichites subtrapezoidalis	Julfa	-1.55	66.5	30777	12
J2011-030	Abichites subtrapezoidalis	Julfa	-2.1	85.5	65412
J2011-150	Abichites subtrapezoidalis	Julfa	-1.55	57	17526
J2012-025	Abichites subtrapezoidalis	Julfa	-1.55	62.7	25796
J2012-080	Abichites subtrapezoidalis	Julfa	-1.55	85.5	65412
J2012-082	Abichites subtrapezoidalis	Julfa	-1.55
J2012-090	Abichites subtrapezoidalis	Julfa	-1.55
J2012-242	Abichites subtrapezoidalis	Julfa	-1.65	57	19381	12
J2012-298	Abichites subtrapezoidalis	Julfa	-1.45	62.7	25796
J2013-009	Abichites subtrapezoidalis	Julfa	-1.55
J2011-190	Abichites abichi	Julfa	-0.65	60.8	22521	11
J2012-053	Abichites abichi	Julfa	-0.85	41.8	24779	7
J2012-054	Abichites abichi	Julfa	-0.85	74.1	9919	7
J2011-186	Abichites abichi	Julfa	-1.5	55.1	17507	8
J2011-199	Abichites abichi	Julfa	-0.9	50	38504	9
J2013-034	Abichites abichi	Julfa	-0.7
J2012-009	Abichites abichi	Julfa	-0.7	60.8	21270
J2013-004	Abichites abichi	Julfa
J2013-035	Abichites abichi	Julfa	-0.7
J2013-036	Abichites abichi	Julfa	-0.7
J2011-072	Abichites alibashiensis	Julfa	-1.4	58.9	20475	13
J2011-083	Abichites alibashiensis	Julfa	-0.71	55.1	16762	9
J2011-084	Abichites alibashiensis	Julfa	-0.5	45.6	11612	5
J2011-085	Abichites alibashiensis	Julfa	-0.5	60.8	22521
J2011-048	Abichites alibashiensis	Julfa	-0.7	60.8	25023
J2011-113	Abichites alibashiensis	Julfa
J2012-004	Abichites alibashiensis	Julfa
J2012-092	Abichites alibashiensis	Julfa	-1.15	51.3	16534
J2012-116	Abichites alibashiensis	Julfa	-0.75	66.5	29467	10
J2012-194	Abichites alibashiensis	Julfa	-1.1	64.6	30014
J2013-003	Abichites alibashiensis	Julfa
J2011-073	Abichites ariaeii	Julfa	-1.15	72.2	35348
J2011-082	Abichites ariaeii	Julfa	-0.7	55.1	15475
J2011-012	Abichites ariaeii	Julfa	-0.75	47.5	10265	7
J2011-168	Abichites ariaeii	Julfa	-0.85	89.3	3143	9
J2012-160	Abichites ariaeii	Julfa	-0.75	39.9	2484	5
J2011-112	Abichites ariaeii	Julfa
J2012-013	Abichites ariaeii	Julfa	-0.35	51.3	12776	8
J2012-226	Abichites ariaeii	Julfa
J2012-275	Abichites ariaeii	Julfa	-0.75	55.1	18624
J2012-175	Abichites stoyanowi	Julfa	-0.35	51.3	12325	9
J2011-056	Abichites stoyanowi	Julfa	-0.65	53.2	15758	10
J2011-189	Abichites stoyanowi	Julfa	-0.56	60.8	25023
J2011-197	Abichites stoyanowi	Julfa	-0.7	34.2	3786	6
J2012-055	Abichites stoyanowi	Julfa	-0.85
J2012-276	Abichites stoyanowi	Julfa	-0.75	70.3		7
J2011-065	Abichites stoyanowi	Julfa
J2011-164	Abichites stoyanowi	Julfa	-0.95	53.2	14249
J2011-195	Abichites stoyanowi	Julfa	-0.65	114	164947
J2012-006	Abichites stoyanowi	Julfa	-0.65	129.2	240113
J2012-084	Abichites stoyanowi	Julfa	-0.65	51.3	12776	8
J2012-104	Abichites stoyanowi	Julfa	-0.75	57	18556
J2012-131	Abichites stoyanowi	Julfa	-0.5	64.6	30014
J2012-134	Abichites stoyanowi	Julfa	-0.6	81.7	70429
J2012-143	Abichites stoyanowi	Julfa	-0.6	43.7	10220	7
J2012-224	Abichites stoyanowi	Julfa
J2012-272	Abichites stoyanowi	Julfa	-0.75	66.5	27830
J2012-274	Abichites stoyanowi	Julfa	-0.75	49.4	11408
J2013-012	Abichites stoyanowi	Julfa
J2013-037	Abichites stoyanowi	Julfa	-0.3
J2012-174	Abichites paucinodus	Julfa	-0.35	62.7	22035	12
J2012-176	Abichites paucinodus	Julfa	-0.35	58.9	19337	9
J2011-192	Abichites paucinodus	Julfa	-0.65	58.9	19337
J2011-193	Abichites paucinodus	Julfa	-0.65	51.3	12776
J2012-100	Abichites paucinodus	Julfa	-0.4	24.7	1678
J2012-273	Abichites paucinodus	Julfa	-0.75	74.1	45298
J2011-052	Abichites shahriari	Julfa	0	22.8	924	3
J2011-032	Abichites shahriari	Julfa	0	17.1	557
J2012-073	Abichites terminalis	Julfa	0
J2012-300	Abichites terminalis	Julfa	0
J2012-072	Abichites terminalis	Julfa	0
J2012-301	Abichites terminalis	Julfa	0
J2011-173	Stoyanowites dieneri	Julfa	-1.55	81.7	36156	12
J2011-171	Stoyanowites dieneri	Julfa	-1.55	77.9	31579	13
J2011-031	Stoyanowites dieneri	Julfa	-2.1	68.4	21377
J2011-037	Stoyanowites dieneri	Julfa	-1.65	93.1	53905	13
J2012-206	Stoyanowites dieneri	Julfa	-1.55
J2012-234	Stoyanowites dieneri	Julfa	-1.55	60.8	15014	10
J2012-271	Stoyanowites dieneri	Julfa	-2.3
J2011-163	Stoyanowites aspinosus	Julfa	-0.95	76	31264	8
J2013-032	Stoyanowites aspinosus	Julfa	-1.5
J2011-109	Stoyanowites aspinosus	Julfa	-1.5	64.6	18008	9
J2012-205	Stoyanowites aspinosus	Julfa	-1.55
J2013-038	Arasella minuta	Julfa	-0.1
J2011-090	Arasella minuta	Julfa	-0.3	32.3	3001	4
J2011-010	Arasella minuta	Julfa	-0.3	20.9	1016
J2011-023	Dzhulfitidae indet.	Julfa	-1.35	77.9	52631
J2011-025	Dzhulfitidae indet.	Julfa	-1.35	91.2	50672
J2011-045	Dzhulfitidae indet.	Julfa	-0.75	81.7	60715
J2011-078	Dzhulfitidae indet.	Julfa	-2.85	96.9	101298
J2011-086	Dzhulfitidae indet.	Julfa	-2.05	125.4	219544
J2011-087	Dzhulfitidae indet.	Julfa	-2.15	93.1	89842
J2011-088	Dzhulfitidae indet.	Julfa	-2.15	38	6109
J2011-094	Dzhulfitidae indet.	Julfa	-0.75	28.5	42549
J2011-154	Dzhulfitidae indet.	Julfa	-0.85	85.5	13422
J2011-155	Dzhulfitidae indet.	Julfa	-0.85	64.6	69587
J2011-166	Dzhulfitidae indet.	Julfa	-0.85	39.9	47570	16
J2011-167	Dzhulfitidae indet.	Julfa	-0.85	49.4	7072
J2011-169	Dzhulfitidae indet.	Julfa	-2.85	108.3	141421
J2012-023	Dzhulfitidae indet.	Julfa	-1.5	85.5	48711	13
J2012-033	Dzhulfitidae indet.	Julfa	-1.85	76	48873
J2012-064	Dzhulfitidae indet.	Julfa	-1.7	47.5	11932
J2012-069	Dzhulfitidae indet.	Julfa	-1.15	83.6	45535	13
J2012-070	Dzhulfitidae indet.	Julfa	-2.85	96.9	101298
J2012-101	Dzhulfitidae indet.	Julfa	-0.55	22.8	1320
J2012-105	Dzhulfitidae indet.	Julfa	-1.55	55.1	16762
J2012-124	Dzhulfitidae indet.	Julfa	-3.55	106.4	134108
J2012-145	Dzhulfitidae indet.	Julfa	-1.45	62.7	30187	14
J2012-148	Dzhulfitidae indet.	Julfa	-2.55	81.7	60715
J2012-149	Dzhulfitidae indet.	Julfa	-2.55	96.9	101298
J2012-161	Dzhulfitidae indet.	Julfa	-1.35	95	95455
J2012-171	Dzhulfitidae indet.	Julfa	-2.5	119.7	190946
J2012-183	Dzhulfitidae indet.	Julfa	-3.3	98.8	107374	19
J2012-259	Dzhulfitidae indet.	Julfa	-2.65	74.1	45298
J2012-297	Dzhulfitidae indet.	Julfa	-1.45	64.6	25239	10
unnumbered	Dzhulfitidae indet.	Julfa	-0.01	32.3	2626
unnumbered	Dzhulfitidae indet.	Julfa	-0.01	28.5	1804
unnumbered	Dzhulfitidae indet.	Julfa	-0.01	22.8	924
unnumbered	Dzhulfitidae indet.	Julfa	-0.01	26.6	1467
unnumbered	Dzhulfitidae indet.	Julfa	-0.01	15.2	274
unnumbered	Dzhulfitidae indet.	Julfa	-0.05	30.4	2190
BM2010-018	Dzhulfitidae indet.	Baghuk	-2.7	98.8	76236	14
BM2010-019	Dzhulfitidae indet.	Baghuk	-1.7	85.5	41752
BM2010-021	Dzhulfitidae indet.	Baghuk	-1.7	74.1	27179
BM2010-022	Dzhulfitidae indet.	Baghuk	-2.45	79.8	42998
BM2010-042	Dzhulfitidae indet.	Baghuk	-1.5	115.9	86666
BM2010-043	Dzhulfitidae indet.	Baghuk	-2.45	114	125359	12
BM2010-044	Dzhulfitidae indet.	Baghuk	-1.5	91.2	42226
BM2010-052	Dzhulfitidae indet.	Baghuk	-3.85	60.8	20934	12
BM2010-062	Dzhulfitidae indet.	Baghuk	-1.2	83.6	37729
BM2010-063	Dzhulfitidae indet.	Baghuk	-2	81.7	51608	12
BM2010-066	Dzhulfitidae indet.	Baghuk	-3	83.6	52199	13
BM2010-100	Dzhulfitidae indet.	Baghuk	-3.4	43.7	8362
BM2010-105	Dzhulfitidae indet.	Baghuk	-1.45	138.7	167931	19
BM2010-128	Dzhulfitidae indet.	Baghuk	-2.45	95	72546
BM2010-133	Dzhulfitidae indet.	Baghuk	-0.05	41.8	9270
BM2010-136	Dzhulfitidae indet.	Baghuk	-3.2	98.8	96637	17
BM2010-137	Dzhulfitidae indet.	Baghuk	-3.2	100.7	102320	14
BM2010-138	Dzhulfitidae indet.	Baghuk	-2.45	102.6	91387	11
BM2010-141	Dzhulfitidae indet.	Baghuk	-3.2	81.7	54643	16
BM2010-155	Dzhulfitidae indet.	Baghuk	-2.75	121.6	142131	14
BM2010-158	Dzhulfitidae indet.	Baghuk	-0.8	57	22680
BM2010-160	Dzhulfitidae indet.	Baghuk	-1.6	93.1	130270	9
BM2010-161	Dzhulfitidae indet.	Baghuk	-1.4	76	48873
BM2010-163	Dzhulfitidae indet.	Baghuk	-1.5	98.8	77114	15
BM2010-164	Dzhulfitidae indet.	Baghuk	-1.6	98.8	75431
BM2010-165	Dzhulfitidae indet.	Baghuk	-1.6	79.8	82036	13
BM2010-166	Dzhulfitidae indet.	Baghuk	-1.7	96.9	58753
BM2010-168	Dzhulfitidae indet.	Baghuk	-1.7	76	70866
BM2010-174	Dzhulfitidae indet.	Baghuk	-2.4	114	117112
BM2010-176	Dzhulfitidae indet.	Baghuk	-2.8	95	120182	14
BM2010-180	Dzhulfitidae indet.	Baghuk	-3.1	115.9	185465	13
BM2010-181	Paratirolites kittli	Baghuk	-3.1	76	41542	13
BM2010-182	Dzhulfitidae indet.	Baghuk	-3.1	104.5	135944
BM2010-183	Dzhulfitidae indet.	Baghuk	-2.9	102.6	128663
BM2010-186	Dzhulfitidae indet.	Baghuk	-3.7	66.5	26213
BM2010-188	Dzhulfitidae indet.	Baghuk	-3.8	79.8	45261	14
BM2010-189	Dzhulfitidae indet.	Baghuk	-3.8	85.5	59149	12
BM2010-190	Dzhulfitidae indet.	Baghuk	-3.8	66.5	26193
BM2010-191	Dzhulfitidae indet.	Baghuk	-3.8	87.4	59464	11.5
BM2010-193	Paratirolites 3	Baghuk	-3.85	64.6	24011
BM2010-194	Paratirolites 3	Baghuk	-3.85	64.6	27013	12
BM2010-195	Dzhulfitidae indet.	Baghuk	-3.85	66.5	27830	12
BM2010-197	Dzhulfitidae indet.	Baghuk	-3.85	60.8	17874	9
BM2011-001	Dzhulfitidae indet.	Baghuk	-3.3	70.3	32121	11
BM2011-002	Paratirolites 6	Baghuk	-1.35	72.2	38054	17
BM2011-003	Paratirolites 5	Baghuk	-2.95	106.4	120748	12
BM2011-004	Paratirolites 1	Baghuk	-2.65	98.8	89835	12
BM2011-005	Alibashites 8	Baghuk	-1.45	133	147070	19
BM2011-006	Paratirolites 2	Baghuk	-2.7	117.8	123133	13
BM2011-007	Dzhulfitidae indet.	Baghuk	-1.85	87.4	56491
BM2011-008	Paratirolites vediensis	Baghuk	-2.75	95	111064	14
BM2011-009	Paratirolites 1	Baghuk	-2.15
BM2011-010	Dzhulfitidae indet.	Baghuk	-1.6	98.8	96637
BM2011-011	Paratirolites 2	Baghuk	-2.35	106.4	95216
BM2011-012	Alibashites ferdowsii	Baghuk	-1.15	64.6	42849	8
BM2011-013	Abichites alibashiensis	Baghuk	-0.5	60.8	27733	7
BM2011-014	Alibashites mojsisovicsi	Baghuk	-0.75	79.8	56926	10
BM2011-015	Paratirolites 21	Baghuk	-2.45	68.4	26764	8
BM2011-016	Stoyanowites aspinosus	Baghuk	-1.6	96.9	60827
BM2011-017	Alibashites 12	Baghuk	-1.7	96.9	65572	14
BM2011-018	Paratirolites 1	Baghuk	-2.45	117.8	138318	13
BM2011-019	Shevyrevitesnodosus	Baghuk	-4.45
BM2011-021	Abichites abichi	Baghuk	-0.9			7
BM2011-022	Paratirolites 1	Baghuk	-1.7	117.8	138318	13
BM2011-023	Paratirolites 3	Baghuk	-3.4	55.1	16762
BM2011-024	Dzhulfitidae indet.	Baghuk	-1.45	68.4	30284
BM2011-025	Dzhulfitidae indet.	Baghuk	-3.2	77.9	44736
BM2011-026	Paratirolites 3	Baghuk	-3.4	55.1	16762
BM2011-027	Paratirolites trapezoidalis	Baghuk	-3.05	77.9	47368
BM2011-028	Paratirolites 21	Baghuk	-1.85
BM2011-029	Dzhulfitidae indet.	Baghuk	-1.4	115.9	147332
BM2011-030	Dzhulfitidae indet.	Baghuk	-2.55	79.8	33396
BM2011-031	Paratirolites 1	Baghuk	-1.15	85.5	57417
BM2011-032	Abichites alibashiensis	Baghuk	-1.15	72.2	46093
BM2011-033	Abichites abichi	Baghuk	-0.9	45.6	10557
BM2011-034	Abichites abichi	Baghuk	-0.9	60.8	25023
BM2011-035	Paratirolites vediensis	Baghuk	-2.8	96.9	108389	13
BM2011-036	Dzhulfitidae indet.	Baghuk	-2.8	72.2	35617
BM2011-037	Dzhulfitidae indet.	Baghuk	-2.8	81.7	51608
BM2011-038	Dzhulfitidae indet.	Baghuk	-3	110.2	134096	14
BM2011-040	Dzhulfitidae indet.	Baghuk	-2.05	148.2	362388	14
BM2011-041	Dzhulfitidae indet.	Baghuk	-2.05	104.5	127051
BM2011-044	Paratirolites 29	Baghuk	-2.45	133	185170	14
BM2011-045	Dzhulfitidae indet.	Baghuk	-2.05	79.8	48090
BM2011-046	Dzhulfitidae indet.	Baghuk	-2.05	70.3	32879
BM2011-047	Dzhulfitidae indet.	Baghuk	-2.05	104.5	96559	13
BM2011-048	Dzhulfitidae indet.	Baghuk	-2.05	100.7	102320	16
BM2011-049	Dzhulfitidae indet.	Baghuk	-2.8	110.2	126646
BM2011-050	Dzhulfitidae indet.	Baghuk	-2.95	83.6	55293
BM2011-053	Paratirolites kittli	Baghuk	-2.7
BM2011-055	Paratirolites kittli	Baghuk	-2.7	98.8	114890	14
BM2011-058	Paratirolites 19	Baghuk	-2	87.4	79533
BM2011-059	Pseudogastrioceras relicuum	Baghuk	-4.8
BM2011-064	Dzhulfitidae indet.	Baghuk	-3	102.6	108221
BM2011-065	Dzhulfitidae indet.	Baghuk	-1	121.6	115459	13
BM2011-068	Dzhulfitidae indet.	Baghuk	-0.05	39.9	8036	3
BM2011-069	Dzhulfitidae indet.	Baghuk	-2.25	133	222640
BM2011-071	Dzhulfitidae indet.	Baghuk	-2.25	64.6	25512
BM2011-072	Dzhulfitidae indet.	Baghuk	-2.25	98.8	91268
BM2011-073	Abichites 15	Baghuk	-0.75	53.2	15631
BM2011-075	Paratirolites vediensis	Baghuk	-2.5	87.4	79533
BM2011-076	Abichites stoyanowi	Baghuk	-0.5	41.8	7357
BM2011-078	Alibashites ferdowsii	Baghuk	-0.8	68.4	39191
BM2011-079	Abichites stoyanowi	Baghuk	-0.8	43.7	7805
BM2011-080	Dzhulfitidae indet.	Baghuk	-0.8	51.3	15031
BM2011-084	Dzhulfitidae indet.	Baghuk	-1.4	87.4	63180
BM2011-085	Alibashites ferdowsii	Baghuk	-1.7
BM2011-091	Dzhulfitidae indet.	Baghuk	-0.01	22.8	924
BM2011-092	Dzhulfitidae indet.	Baghuk	-0.01	17.1	390
BM2011-097	Dzhulfitidae indet.	Baghuk	-0.3	41.8	8131
BM2011-099	Abichites abichi	Baghuk	-1.1	51.3	15031
BM2011-102	Dzhulfitidae indet.	Baghuk	-0.01	17.1	390
BM2011-103	Dzhulfitidae indet.	Baghuk	-0.01	15.2	274
BM2011-104	Alibashites 10	Baghuk	-1.6	117.8	109198
BM2011-105	Alibashites ferdowsii	Baghuk	-2.25	77.9	76315	10
BM2011-116	Paratirolites 2	Baghuk	-2.45	110.2	126646
BM2011-117	Paratirolites 2	Baghuk	-2.45
BM2011-118	Abichites alibashiensis	Baghuk	-0.55	58.9	25025
BM2011-119	Abichites 15	Baghuk	-0.55	74.1	36239	9
BM2011-120	Abichites 15	Baghuk	-0.55	57	16495
BM2011-124	Dzhulfitidae indet.	Baghuk	-2.1	106.4	113992
BM2011-126	Abichites serus	Baghuk	-0.6	55.1	15052	9
BM2011-127	Dzhulfitidae indet.	Baghuk	-0.6	60.8	25023
BM2011-128	Dzhulfitidae indet.	Baghuk	-0.6	53.2	16763
BM2011-129	Paratirolites 21	Baghuk	-1.2	57	22680
BM2011-130	Alibashites ferdowsii	Baghuk	-1.2	58.9	32987
BM2011-134	Abichites abichi	Baghuk	-0.35	66.5	32741	8
BM2011-135	Abichites abichi	Baghuk	-0.35	58.9	22750
BM2011-136	Dzhulfitidae indet.	Baghuk	-0.35	64.6	30014
BM2011-137	Dzhulfitidae indet.	Baghuk	-0.35	68.4	35628
BM2011-144	Dzhulfitidae indet.	Baghuk	-2.55	77.9	44736
BM2011-148	Abichites stoyanowi	Baghuk	-1
BM2011-151	Dzhulfitidae indet.	Baghuk	-2.9	146.3	296333	16
BM2011-152	Dzhulfitidae indet.	Baghuk	-2.9	114	140205
BM2011-153	Paratirolites vediensis	Baghuk	-2.9	96.9	108389	12
BM2011-154	Paratirolites 3	Baghuk	-2.9	74.1	36239
BM2011-155	Paratirolites vediensis	Baghuk	-2.9	81.7	64965
BM2011-156	Paratirolites 5	Baghuk	-2.9	100.7	102320
BM2011-159	Paratirolites 5	Baghuk	-3.2	79.8	50919
BM2011-160	Dzhulfitidae indet.	Baghuk	-3.2	87.4	66897
BM2011-166	Pseudogastrioceras relicuum	Baghuk	-3.85
BM2011-167	Paratirolites 3	Baghuk	-3.85	91.2	67562
BM2011-168	Paratirolites 3	Baghuk	-3.85	76	39098
BM2011-169	Paratirolites 3	Baghuk	-3.85
BM2011-170	Paratirolites 3	Baghuk	-3.85	72.2	33522
BM2011-173	Alibashites ferdowsii	Baghuk	-1.15	60.8	36283
BM2011-176	Abichites alibashiensis	Baghuk	-1.05	60.8	20018
BM2011-177	Alibashites ferdowsii	Baghuk	-1.05
BM2011-178	Alibashites ferdowsii	Baghuk	-1.05	57	29897
BM2011-183	Abichites abichi	Baghuk	-0.8	85.5	69587
BM2011-184	Abichites abichi	Baghuk	-0.8	68.4	35628
BM2011-185	Dzhulfitidae indet.	Baghuk	-0.8	45.6	10557
BM2011-189	Paratirolites kittli	Baghuk	-2.7	95	102137
BM2011-191	Paratirolites kittli	Baghuk	-3	129.2	256921	15
BM2011-192	Paratirolites 3	Baghuk	-3	81.7	48572
BM2011-193	Paratirolites vediensis	Baghuk	-3	152	390984	19
BM2011-194	Dzhulfitidae indet.	Baghuk	-3.85	70.3	30945
BM2011-198	Paratirolites 3	Baghuk	-3.85	60.8	20018
BM2011-200	Dzhulfitidae indet.	Baghuk	-0.05	28.5	2938
BM2011-201	Dzhulfitidae indet.	Baghuk	-3.85	66.5	26193
BM2011-204	Dzhulfitidae indet.	Baghuk	-0.45	57	20618
BM2011-205	Abichites 18	Baghuk	-0.4	36.1	3300	5
BM2011-209	Stoyanowites aspinosus	Baghuk	-1.8	77.9	31579
BM2011-212	Paratirolites 1	Baghuk	-2.6	98.8	81604
BM2011-213	Paratirolites 1	Baghuk	-2.6	89.3	60256
BM2011-218	Shevyrevites shevyrevi	Baghuk	-4.7
BM2011-219	Shevyrevites shevyrevi	Baghuk	-4.7
BM2011-220	Shevyrevites shevyrevi	Baghuk	-4.7
BM2011-221	Shevyrevites shevyrevi	Baghuk	-4.7
BM2011-222	Shevyrevites shevyrevi	Baghuk	-4.7
BM2011-223	Shevyrevites shevyrevi	Baghuk	-4.7
BM2011-224	Shevyrevites shevyrevi	Baghuk	-4.7
BM2011-225	Shevyrevites shevyrevi	Baghuk	-4.7
BM2011-226	Shevyrevites shevyrevi	Baghuk	-4.7
BM2011-227	Shevyrevites shevyrevi	Baghuk	-4.7
BM2011-228	Shevyrevites shevyrevi	Baghuk	-4.7
BM2011-229	Shevyrevites shevyrevi	Baghuk	-4.7
BM2011-230	Shevyrevites shevyrevi	Baghuk	-4.7
BM2011-231	Shevyrevites shevyrevi	Baghuk	-4.7
BM2011-232	Shevyrevites shevyrevi	Baghuk	-4.7
BM2011-233	Shevyrevites shevyrevi	Baghuk	-4.7
BM2011-234	Shevyrevites shevyrevi	Baghuk	-4.7
BM2011-235	Shevyrevites shevyrevi	Baghuk	-4.7
BM2011-236	Shevyrevites shevyrevi	Baghuk	-4.7
BM2011-237	Shevyrevites shevyrevi	Baghuk	-4.7
BM2011-238	Shevyrevites shevyrevi	Baghuk	-4.7
BM2011-247	Dzhulfitidae indet.	Baghuk	-1.85	114	123377	12
BM2011-251	Dzhulfitidae indet.	Baghuk	-3.7	87.4	59464	12
BM2011-252	Dzhulfitidae indet.	Baghuk	-2.45	161.5	468971
BM2011-254	Dzhulfitidae indet.	Baghuk	-1.2	81.7	35215
BM2011-257	Dzhulfitidae indet.	Baghuk	-1.6	102.6	108221
BM2011-258	Dzhulfitidae indet.	Baghuk	-2.7	85.5	74458
BM2011-259	Dzhulfitidae indet.	Baghuk	-1.6	66.5	47065	9
BM2011-268	Dzhulfitidae indet.	Baghuk	-2.75	74.1	32162
BM2011-271	Dzhulfitidae indet.	Baghuk	-1.7	98.8	81604
BM2011-272	Dzhulfitidae indet.	Baghuk	-3.85	64.6	27033	13
BM2011-288	Dzhulfitidae indet.	Baghuk	-1.6	108.3	127279	10
BM2011-292	Dzhulfitidae indet.	Baghuk	-2.7	87.4	79533
BM2011-293	Dzhulfitidae indet.	Baghuk	-0.4	64.6	33016	10
BM2011-294	Dzhulfitidae indet.	Baghuk	-0.5	62.7	37560	8
BM2011-319	Dzhulfitidae indet.	Baghuk	-3.85	83.6	52040	15
BM2011-320	Dzhulfitidae indet.	Baghuk	-0.4	83.6	51111	11
BM2011-330	Dzhulfitidae indet.	Baghuk	-3	100.7	100853	17
BM2011-345	Dzhulfitidae indet.	Baghuk	-0.8	68.4	35628	9
BM2011-421	Dzhulfitidae indet.	Baghuk	-1.35	98.8	99952	13
BM2011-424	Dzhulfitidae indet.	Baghuk	-0.55	64.6	24011	7
BM2011-427	Dzhulfitidae indet.	Baghuk	-2.45	91.2	90364
BM2011-435	Dzhulfitidae indet.	Baghuk	-1.6	83.6	58545	12
BM2011-436	Dzhulfitidae indet.	Baghuk	-1.5	64.6	29593	14
BM2011-437	Dzhulfitidae indet.	Baghuk	-1.7	91.2	87045	13
BM2011-438	Dzhulfitidae indet.	Baghuk	-1.7	127.3	112801	17
BM2011-439	Dzhulfitidae indet.	Baghuk	-2.8	95	80362	13
BM2011-440	Dzhulfitidae indet.	Baghuk	-0.8	58.9	25025
BM2011-441	Dzhulfitidae indet.	Baghuk	-1.5	114	97318
BM2011-442	Dzhulfitidae indet.	Baghuk	-1.5	95	85910	15
BM2011-443	Dzhulfitidae indet.	Baghuk	-1.6	117.8	116708	22
BM2011-444	Dzhulfitidae indet.	Baghuk	-1.7	112.1	119195
BM2011-445	Dzhulfitidae indet.	Baghuk	-1.5	87.4	43698	17
BM2011-446	Dzhulfitidae indet.	Baghuk	-1.5	79.8	28288
BM2011-447	Dzhulfitidae indet.	Baghuk	-0.05	53.2	16763
BM2011-449	Dzhulfitidae indet.	Baghuk	-0.8	62.7	30187	8
BM2011-451	Dzhulfitidae indet.	Baghuk	-1.6	85.5	62628
BM2011-453	Dzhulfitidae indet.	Baghuk	-0.55	53.2	13411	7
BM2011-456	Dzhulfitidae indet.	Baghuk	-1.6	62.7	39792	10
BM2011-457	Dzhulfitidae indet.	Baghuk	-1.6	85.5	62628	12
BM2011-458	Dzhulfitidae indet.	Baghuk	-1.5	41.8	6586	6
BM2011-459	Dzhulfitidae indet.	Baghuk	-2.8	112.1	183220	19
BM2011-461	Dzhulfitidae indet.	Baghuk	-1.7	76	37144
BM2011-462	Dzhulfitidae indet.	Baghuk	-3.85	66.5	30545	12
BM2011-463	Dzhulfitidae indet.	Baghuk	-0.5	72.2	44373
BM2011-466	Dzhulfitidae indet.	Baghuk	-2.35	129.2	170480	14
BM2011-467	Dzhulfitidae indet.	Baghuk	-2.05	114	125359	13
BM2011-469	Dzhulfitidae indet.	Baghuk	-1.7	106.4	101922	14
BM2011-471	Dzhulfitidae indet.	Baghuk	-1.5	81.7	30357	10
BM2011-474	Dzhulfitidae indet.	Baghuk	-2.45	108.3	107480	17
BM2011-477	Dzhulfitidae indet.	Baghuk	-2.05	95	72546
BM2012-002	Dzhulfitidae indet.	Baghuk	-2.05	96.9	91168	14
BM2012-003	Dzhulfitidae indet.	Baghuk	-3	106.4	120697	12
BM2012-004	Dzhulfitidae indet.	Baghuk	-1.1	81.7	54018	11
BM2012-005	Dzhulfitidae indet.	Baghuk	-1.7	98.8	81604	17
BM2012-006	Dzhulfitidae indet.	Baghuk	-2.05	87.4	66897
BM2012-008	Dzhulfitidae indet.	Baghuk	-1.7	115.9	131732	12
BM2012-009	Dzhulfitidae indet.	Baghuk	-1	93.1	52108
BM2012-010	Dzhulfitidae indet.	Baghuk	-2.75	114	117112	15
BM2012-011	Dzhulfitidae indet.	Baghuk	-0.05	51.3	12626	6
BM2012-012	Dzhulfitidae indet.	Baghuk	-1.45	95	55364
BM2012-014	Dzhulfitidae indet.	Baghuk	-2.05	89.3	71355
BM2012-016	Dzhulfitidae indet.	Baghuk	-0.8	57	22680
BM2012-017	Dzhulfitidae indet.	Baghuk	-1.05	51.3	12025	8
BM2012-018	Dzhulfitidae indet.	Baghuk	-0.45	55.1	15645	9
BM2012-020	Dzhulfitidae indet.	Baghuk	-2.8	87.4	66897	14
BM2012-021	Dzhulfitidae indet.	Baghuk	-0.55	57	16495	8
BM2012-023	Dzhulfitidae indet.	Baghuk	-1.2	72.2	60759	15
BM2012-025	Paratirolites 5	Baghuk	-3.2	112.1	141152	14
BM2012-026	Abichites stoyanowi	Baghuk	-0.4	57	16511	7
BM2012-027	Abichites abichi	Baghuk	-0.4	49.4	13422
BM2012-028	Alibashites ferdowsii	Baghuk	-1.4	133	222640	15
BM2012-032	Paratirolites kittli	Baghuk	-2.9	110.2	134096
BM2012-033	Paratirolites vediensis	Baghuk	-2.9	110	159425
BM2012-037	Paratirolites vediensis	Baghuk	-2.45	112	159425	15
BM2012-038	Dzhulfitidae indet.	Baghuk	-2.5	100.7	96635
BM2012-039	Paratirolites 1	Baghuk	-2.5	104.5	96559
BM2012-041	Paratirolites kittli	Baghuk	-2.3	129.2	256921	12
BM2012-042	Pseudogastrioceras relicuum	Baghuk	-3.3
BM2012-043	Paratirolites vediensis	Baghuk	-3.1	85.5	74458	14
BM2012-044	Paratirolites 2	Baghuk	-3.1
BM2012-045	Paratirolites kittli	Baghuk	-3.1
BM2012-047	Paratirolites 2	Baghuk	-2.75	106.4	95216
BM2012-049	Paratirolites vediensis	Baghuk	-2.75	102.6	128663
BM2012-050	Paratirolites vediensis	Baghuk	-2.75	110.2	159425
BM2012-051	Paratirolites kittli	Baghuk	-2.75	129.2	221062
BM2012-056	Paratirolites 2	Baghuk	-2.75	91.2	59961	13
BM2012-057	Dzhulfitidae indet.	Baghuk	-1.45	104.5	73689
BM2012-058	Dzhulfitidae indet.	Baghuk	-1.5	102.6	60123	12
BM2012-059	Dzhulfitidae indet.	Baghuk	-2.45	159.6	321355	16
BM2012-060	Dzhulfitidae indet.	Baghuk	-2.45	117.8	138318	11
BM2012-062	Dzhulfitidae indet.	Baghuk	-2.05	85.5	62628
BM2012-063	Dzhulfitidae indet.	Baghuk	-2.75	95	67773
BM2012-064	Dzhulfitidae indet.	Baghuk	-3.85	95	85910	12
BM2012-066	Dzhulfitidae indet.	Baghuk	-0.4	55.1	20487
BM2012-068	Dzhulfitidae indet.	Baghuk	-2.05	79.8	50919
BM2012-069	Dzhulfitidae indet.	Baghuk	-2.75	104.5	90206
BM2012-072	Dzhulfitidae indet.	Baghuk	-1.7	98.8	81604
BM2012-074	Dzhulfitidae indet.	Baghuk	-3.4	58.9	20475
BM2012-076	Dzhulfitidae indet.	Baghuk	-2.75	112.1	167814	15
BM2012-078	Dzhulfitidae indet.	Baghuk	-1.7	83.6	49438
BM2012-079	Dzhulfitidae indet.	Baghuk	-2.75	108.3	100409
BM2012-080	Dzhulfitidae indet.	Baghuk	-2.05	77.9	40000
BM2012-081	Dzhulfitidae indet.	Baghuk	-2	114	139082	15
BM2012-082	Dzhulfitidae indet.	Baghuk	-2.75	76	34700
BM2012-083	Dzhulfitidae indet.	Baghuk	-1.7	85.5	45231
BM2012-084	Dzhulfitidae indet.	Baghuk	-2.65	117.8	115265	14
BM2012-085	Dzhulfitidae indet.	Baghuk	-2.7	98.8	88527	13
BM2012-086	Dzhulfitidae indet.	Baghuk	-2.05	110.2	113237
BM2012-087	Dzhulfitidae indet.	Baghuk	-2.2	163.4	485719	17
BM2012-090	Dzhulfitidae indet.	Baghuk	-2.35	85.5	49407	17
BM2012-091	Dzhulfitidae indet.	Baghuk	-1.5	100.7	102320	16
BM2012-097	Paratirolites 1	Baghuk	-2.55	83.6	49438
BM2012-098	Dzhulfitidae indet.	Baghuk	-3.05	102.6	102209
BM2012-101	Paratirolites 6	Baghuk	-1.1
BM2012-104	Dzhulfitidae indet.	Baghuk	-0.6	66.5	32741
BM2012-105	Paratirolites 1	Baghuk	-2.5	102.6	91387
BM2012-106	Abichites stoyanowi	Baghuk	-0.75	41.8	7193	7
BM2012-107	Abichites alibashiensis	Baghuk	-0.75
BM2012-108	Abichites serus	Baghuk	-0.75	53.2	13578	9
BM2012-110	Paratirolites 1	Baghuk	-2.25	115.9	123066	14
BM2012-111	Paratirolites 1	Baghuk	-2.25	87.4	56491
BM2012-112	Paratirolites vediensis	Baghuk	-2.75	127.3	233075	16
BM2012-113	Dzhulfitidae indet.	Baghuk	-1.2	76	71284	11
BM2012-114	Dzhulfitidae indet.	Baghuk	-2.75	106.4	143495	13
BM2012-115	Dzhulfitidae indet.	Baghuk	-3.4	64.6	27013
BM2012-116	Dzhulfitidae indet.	Baghuk	-2.75	100.7	80719	14
BM2012-120	Dzhulfitidae indet.	Baghuk	-3.55	57	18556
BM2012-123	Paratirolites 3	Baghuk	-3.6	68.4	28503	11
BM2012-126	Dzhulfitidae indet.	Baghuk	-2.85	87.4	63180
BM2012-127	Paratirolites kittli	Baghuk	-2.85	159.6	452613
BM2012-130	Paratirolites 6	Baghuk	-1.4
BM2012-131	Abichites 15	Baghuk	-0.4
BM2012-133	Abichites 18	Baghuk	-0.4	49.4	8402	6
BM2012-134	Abichites 18	Baghuk	-0.4	39.9	4455
BM2012-135	Dzhulfitidae indet.	Baghuk	-0.4	81.7	42008	10
BM2012-139	Abichites alibashiensis	Baghuk	-0.4
BM2012-140	Abichites abichi	Baghuk	-0.4	45.6	10557	6
BM2012-144	Dzhulfitidae indet.	Baghuk	-0.05	24.7	1913
BM2012-147	Abichites stoyanowi	Baghuk	-0.05	41.8	6263	7
BM2012-148	Arasella 22	Baghuk	-0.01	26.6	2389
BM2012-150	Arasella 22	Baghuk	-0.05	30.4	3566
BM2012-151	Abichites abichi	Baghuk	-0.05	57	20618
BM2012-152	Arasella 22	Baghuk	-0.05	22.8	1504
BM2012-153	Abichites 18	Baghuk	-0.05	43.7	5853	6
BM2012-154	Arasella 22	Baghuk	-0.05	30.4	3566
BM2012-155	Alibashites 9	Baghuk	-1.2	95	55364
BM2012-156	Alibashites 9	Baghuk	-1.2	93.1	52108
BM2012-157	Shevyrevites shevyrevi	Baghuk	-4
BM2012-159	Abichites abichi	Baghuk	-0.85	62.7	27443	8
BM2012-160	Paratirolites kittli	Baghuk	-2.45	110.2	159425
BM2012-163	Dzhulfitidae indet.	Baghuk	-2.05	127.3	174553	9
BM2012-164	Dzhulfitidae indet.	Baghuk	-2.75	125.4	234912	14
BM2012-176	Dzhulfitidae indet.	Baghuk	-2.45	114	125359
BM2012-181	Dzhulfitidae indet.	Baghuk	-3.7	77.9	42105	12
BM2012-185	Dzhulfitidae indet.	Baghuk	-3	112.1	141152
BM2012-187	Dzhulfitidae indet.	Baghuk	-2.8	104.5	114346
BM2012-188	Dzhulfitidae indet.	Baghuk	-3	81.7	54643
BM2012-191	Dzhulfitidae indet.	Baghuk	-3.2	95	85910
BM2012-194	Dzhulfitidae indet.	Baghuk	-3	117.8	163797
BM2012-195	Dzhulfitidae indet.	Baghuk	-2.45	115.9	131732
BM2012-207	Dzhulfitidae indet.	Baghuk	-1.1	60.8	27525
BM2012-208	Dzhulfitidae indet.	Baghuk	-1	108.3	82024	20
BM2012-211	Dzhulfitidae indet.	Baghuk	-1.15	98.8	96637
BM2012-212	Dzhulfitidae indet.	Baghuk	-1.1	72.2	46093	11
BM2012-213	Dzhulfitidae indet.	Baghuk	-1.1	76	53760
BM2012-215	Paratirolites kittli	Baghuk	-2.8	76	52294	13
BM2012-217	Paratirolites 2	Baghuk	-2.8	95	67773
BM2012-218	Paratirolites 2	Baghuk	-2.8	108.3	100409	14
BM2012-219	Dzhulfitidae indet.	Baghuk	-2.8	104.5	107993
BM2012-220	Paratirolites trapezoidalis	Baghuk	-2.8	102.6	108221	15
BM2012-221	Paratirolites kittli	Baghuk	-2.8	87.4	79533	13.5
BM2012-222	Dzhulfitidae indet.	Baghuk	-2.8	125.4	186612
BM2012-223	Paratirolites 3	Baghuk	-2.8	87.4	59464
BM2012-225	Dzhulfitidae indet.	Baghuk	-1.4	60.8	25023
BM2012-227	Shevyrevites shevyrevi	Baghuk	-4.7
BM2012-228	Shevyrevites shevyrevi	Baghuk	-4.7
BM2012-229	Dzhulfites 36	Baghuk	-4.7
BM2012-230	Shevyrevites shevyrevi	Baghuk	-4.7
BM2012-231	Shevyrevites shevyrevi	Baghuk	-4.7
BM2012-232	Shevyrevites shevyrevi	Baghuk	-4.7
BM2012-233	Shevyrevites shevyrevi	Baghuk	-4.7
BM2012-234	Shevyrevites shevyrevi	Baghuk	-4.7
BM2012-235	Dzhulfitidae indet.	Baghuk	-2.05	114	125359
BM2012-237	Dzhulfitidae indet.	Baghuk	-2.8	159.6	452613
BM2012-240	Dzhulfitidae indet.	Baghuk	-2.25	81.7	43108	12
BM2012-242	Dzhulfitidae indet.	Baghuk	-2.75	127.3	245752	13
BM2012-243	Dzhulfitidae indet.	Baghuk	-2.05	76	37144	13
BM2012-249	Dzhulfitidae indet.	Baghuk	-2.45	81.7	46143	11
BM2012-250	Dzhulfitidae indet.	Baghuk	-1.2	119.7	110749
BM2012-305	Dzhulfitidae indet.	Baghuk	-3.05	79.8	48090
BM2013-127	Stoyanowites dieneri	Baghuk	-1.8
BM2013-130	Alibashites 10	Baghuk	-1.3
BM2013-131	Paratirolites 6	Baghuk	-1.1
BM2013-132	Dzhulfites 35	Baghuk	-5
BM2013-133	Shevyrevites shevyrevi	Baghuk	-5
BM2013-134	Shevyrevites shevyrevi	Baghuk	-5
BM2013-135	Shevyrevites shevyrevi	Baghuk	-5
BM2013-136	Shevyrevites shevyrevi	Baghuk	-5
BM2013-137	Shevyrevites shevyrevi	Baghuk	-5
BM2013-138	Shevyrevites shevyrevi	Baghuk	-5
BM2013-139	Shevyrevites shevyrevi	Baghuk	-5
BM2013-140	Shevyrevites shevyrevi	Baghuk	-5
BM2013-141	Shevyrevites shevyrevi	Baghuk	-5
BM2013-142	Shevyrevites shevyrevi	Baghuk	-5
BM2013-143	Shevyrevites shevyrevi	Baghuk	-5
BM2013-144	Shevyrevites shevyrevi	Baghuk	-5
BM2013-146	Shevyrevites shevyrevi	Baghuk	-4.8
BM2013-147	Shevyrevites shevyrevi	Baghuk	-4.8
BM2013-149	Dzhulfites 36	Baghuk	-4.8
BM2013-150	Shevyrevites shevyrevi	Baghuk	-4.9
BM2013-151	Shevyrevites shevyrevi	Baghuk	-4.9
BM2013-152	Shevyrevites shevyrevi	Baghuk	-4.9
BM2013-159	Paratirolites kittli	Baghuk	-3.5
BM2013-160	Paratirolites vediensis	Baghuk	-2.9
BM2013-169	Pseudogastrioceras relicuum	Baghuk	-4.7
BM2013-171	Dzhulfites 35	Baghuk	-4.7
BM2013-177	Abichites stoyanowi	Baghuk	-0.6
BM2013-180	Abichites abichi	Baghuk	-0.6
BM2013-181	Alibashites mojsisovicsi	Baghuk	-1.35
BM2013-185	Arasella 22	Baghuk	-0.05
BM2013-186	Shevyrevites shevyrevi	Baghuk	-5.1
BM2013-187	Shevyrevites shevyrevi	Baghuk	-5.1
BM2013-188	Shevyrevites shevyrevi	Baghuk	-5.1
BM2013-189	Shevyrevites shevyrevi	Baghuk	-5.1
BM2013-190	Shevyrevites shevyrevi	Baghuk	-5.1
BM2013-191	Shevyrevites shevyrevi	Baghuk	-5.1
BM2013-192	Shevyrevites shevyrevi	Baghuk	-5.1
BM2013-193	Shevyrevites shevyrevi	Baghuk	-5.1
BM2013-194	Shevyrevites shevyrevi	Baghuk	-5.1
BM2013-195	Shevyrevites shevyrevi	Baghuk	-5.1
BM2013-196	Shevyrevites shevyrevi	Baghuk	-5.1
BM2013-199	Pseudogastrioceras relicuum	Baghuk	-4.9
BM2013-214	Paratirolites kittli	Baghuk	-2.65
BM2013-216	Paratirolites vediensis	Baghuk	-2.95
BM2013-217	Paratirolites kittli	Baghuk	-2.95
BM2013-218	Paratirolites kittli	Baghuk	-2.95
BM2013-219	Paratirolites kittli	Baghuk	-2.95
BM2013-236	Paratirolites vediensis	Baghuk	-2.95
BMVH-147	Dzhulfitidae indet.	Baghuk	-1.7	95	57273	12
unnumbered	Dzhulfitidae indet.	Baghuk	-0.05	30.4	3566	3
unnumbered	Dzhulfitidae indet.	Baghuk	-0.05	26.6	2389
unnumbered	Dzhulfitidae indet.	Baghuk	-0.05	39.9	8062
unnumbered	Dzhulfitidae indet.	Baghuk	-0.05	32.3	4277	3
unnumbered	Dzhulfitidae indet.	Baghuk	-0.05	30.4	3566
unnumbered	Dzhulfitidae indet.	Baghuk	-0.05	26.6	2389
